# Supplementary material for: Neisseria gonorrhoeae employs two protein inhibitors to evade killing by human lysozyme
Source: PLOS journal article supplement (doi:10.1371/journal.ppat.1007080), 2018-07-05
Supplement: S5 (10.1371/journal.ppat.1007080.s005) [file journal.ppat.1007080.s005]

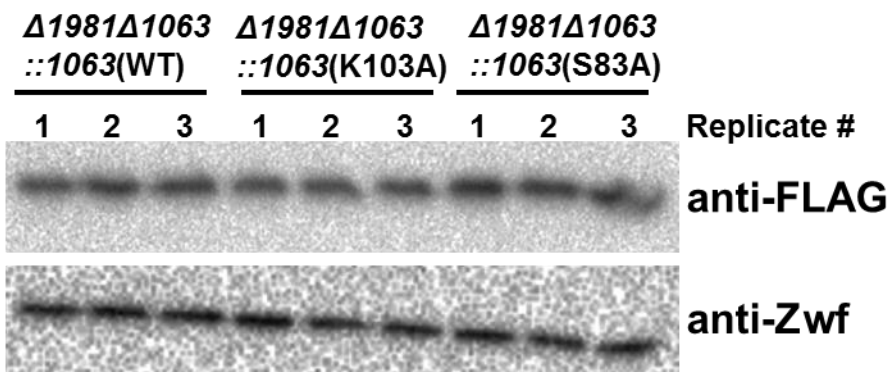

**S5 Fig. Expression of 1063(WT)-FLAG, 1063(S83A)-FLAG, and 1063(K103A)-FLAG.**

$\Delta 1981\Delta 1063$  Gc complemented with 1063(WT)-FLAG, 1063(S83A)-FLAG, and 1063(K103A)-FLAG were grown to mid-log phase with 1mM IPTG as in Fig. 5D. Bacterial lysates were separated by SDS-PAGE and immunoblotted using anti-FLAG antibody. Blots were then stripped and probed with anti-Zwf antibody as a loading control. Shown are 3 biological replicates for each strain.
